# Supplementary material for: Washing-free electrochemical DNA detection using double-stranded probes and competitive hybridization reactionElectronic supplementary information (ESI) available: HPLC and MALDI-TOF MS data of the synthetic ferrocene-conjugated signaling DNA. Grazing angle FT-IR spectra. Sequences of PCR mimics. See http://www.rsc.org/suppdata/cc/b4/b402914c/
Source: Royal Society of Chemistry journal article supplement (doi:10.1039/b402914c), 2004-01-01
Supplement: b402914c.pdf [file b402914c.pdf]

Supplementary information.

S1. HPLC data and MALDI-TOF MS spectra of the synthetic ferrocene-conjugated signaling DNA.

Signaling DNA: 5'-FcFcGCCACGCGGGGAGCAG-3'.

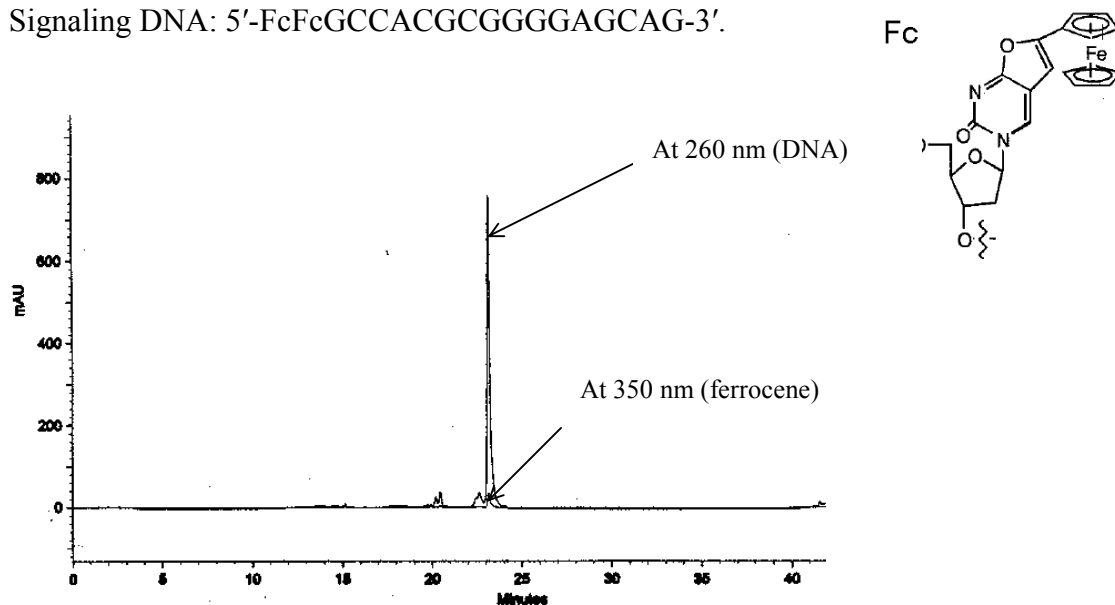

Figure S1. HPLC of signaling DNA

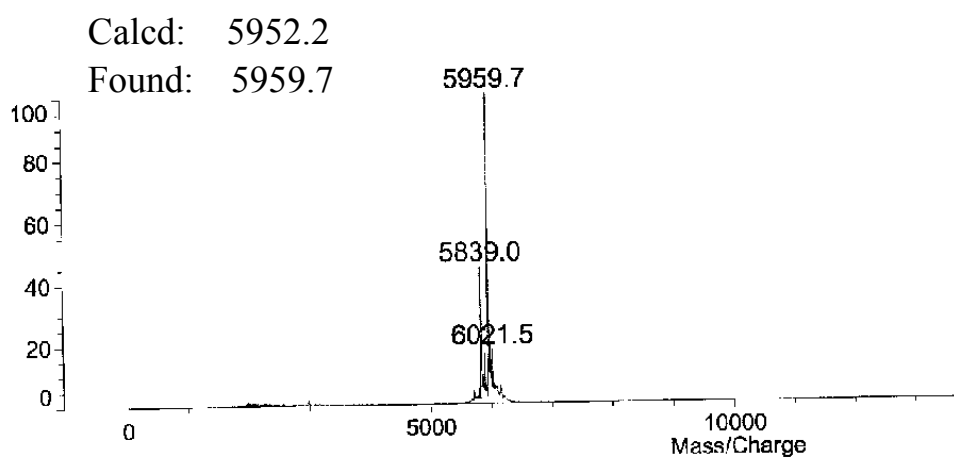

Figure S2. MALDI-TOF MS of signaling DNA

## S2. Grazing angle reflectance FT-IR.

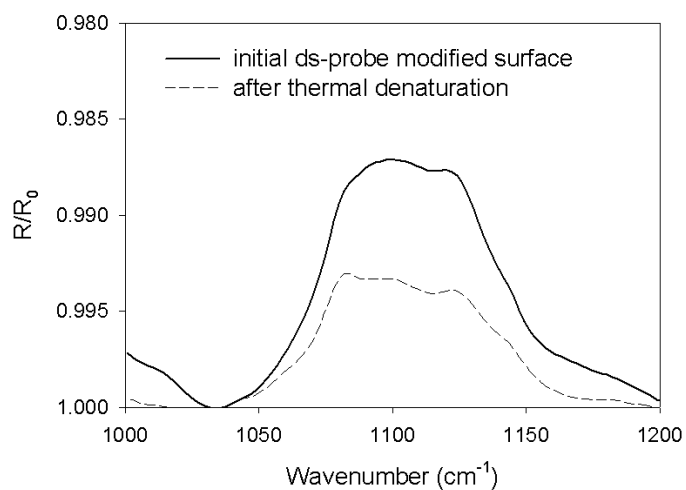

## S3. Sequences of synthetic PCR product (codon 72, exon 4, *p53*) mimics.

Wild type

Forward:

5' GTT CAC TGA AGA CCC AGG TCC AGA TGA AGC TCC CAG AAT GCC AGA  
GGC TGC TCC CCG CGT GGC CCC TGG ACC AGC AGC TCC TAC ACC GGC  
GGC CCC TGC 3'

Mutant

Forward:

5' GTT CAC TGA AGA CCC AGG TCC AGA TGA AGC TCC CAG AAT GCC AGA  
GGC TGC TCC CCC CGT GGC CCC TGG ACC AGC AGC TCC TAC ACC GGC  
GGC CCC TGC 3'
